# Supplementary material for: Evidence for multi-rifting in the Variscan–Alpine cycle transition: insights from the European western Southern Alps
Source: Copernicus journal article supplement (doi:10.5194/se-16-619-2025), 2025-07-10
Supplement: Supplementary file 2 [file se-16-619-2025-supplement.zip]

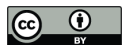

*Supplement of*

**Evidence for multi-rifting in the Variscan–Alpine cycle transition:  
insights from the European western Southern Alps**

**Emanuele Scaramuzzo et al.**

*Correspondence to:* Maria Giuditta Fellin ([giuditta.fellin@eaps.ethz.ch](mailto:giuditta.fellin@eaps.ethz.ch))

- [se-16-619-2025-supplement-title-page.pdf](#)
- [Table S2 caption.pdf](#)
- [supplementary S1 caption.pdf](#)
- [supplementary\\_S1.pdf](#)
- [supplementary\\_Table S2.pdf](#)

The copyright of individual parts of the supplement might differ from the article licence.
