# Supplementary material for: Evidence for multi-rifting in the Variscan–Alpine cycle transition: insights from the European western Southern Alps
Source: Copernicus journal article supplement (doi:10.5194/se-16-619-2025), 2025-07-10
Supplement: Supplementary file 3 [file se-16-619-2025-supplement.zip]

Table S2: (U-Th)/He results: Rs: equivalent spherical radius, L: zircon length; W1: zircon width; W2: zircon width; H: average height of zircon pinnacle; eU: effective Uranium; Ft: alpha-ejection correction factor; Ft Age: alpha-ejection corrected age.
