# Supplementary material for: Evidence for multi-rifting in the Variscan–Alpine cycle transition: insights from the European western Southern Alps
Source: Copernicus journal article supplement (doi:10.5194/se-16-619-2025), 2025-07-10
Supplement: Supplementary file 4 [file se-16-619-2025-supplement.zip]

Supplementary S1: Restored 3D mesh surfaces of the top horizons of the tectono-stratigraphic units.
