# Supplementary material for: Evidence for multi-rifting in the Variscan–Alpine cycle transition: insights from the European western Southern Alps
Source: Copernicus journal article supplement (doi:10.5194/se-16-619-2025), 2025-07-10
Supplement: Supplementary file 5 [file se-16-619-2025-supplement.zip]

| Sample     | Zircon grain | 238U<br>mol | 238U 1s<br>% | 232Th<br>mol | 232Th 1s<br>% | Th/U | 4He<br>mol | 4He 1s<br>% | Rs<br>μm | L<br>μm | W1<br>μm | W2<br>μm | H<br>μm | Mass<br>μg | eU<br>ppm | Ft   | Ft Age<br>Ma | Ft Age<br>1s<br>Ma | Average<br>Age<br>Ma | Average<br>Age 1s<br>Ma / % |
|------------|--------------|-------------|--------------|--------------|---------------|------|------------|-------------|----------|---------|----------|----------|---------|------------|-----------|------|--------------|--------------------|----------------------|-----------------------------|
| fct        | gf134fctz1   | 6.13E-12    | 0.32         | 3.45E-12     | 0.31          | 0.56 | 1.82E-13   | 0.31        | 39.99    | 188     | 66       | 58       | 27      | 2.70       | 614       | 0.71 | 28.6         | 0.09               | 27.21                | 1.54<br>5.66                |
|            | gf134fctz2   | 1.41E-11    | 0.10         | 7.72E-12     | 0.22          | 0.55 | 4.67E-13   | 0.25        | 59.07    | 260     | 102      | 85       | 40      | 8.30       | 457       | 0.80 | 28.5         | 0.07               |                      |                             |
|            | gf135fctz1   | 1.53E-11    | 0.39         | 9.19E-12     | 0.20          | 0.60 | 4.96E-13   | 0.24        | 58.23    | 354     | 101      | 75       | 43      | 10.49      | 398       | 0.80 | 27.7         | 0.07               |                      |                             |
|            | gf135fctz2   | 5.22E-12    | 0.28         | 3.22E-12     | 0.29          | 0.62 | 1.54E-13   | 0.25        | 52.69    | 202     | 86       | 86       | 38      | 5.20       | 274       | 0.78 | 25.8         | 0.06               |                      |                             |
|            | gf140fctz1   | 1.28E-11    | 0.44         | 7.01E-12     | 0.37          | 0.55 | 4.09E-13   | 0.24        | 56.39    | 242     | 96       | 83       | 39      | 7.01       | 491       | 0.79 | 27.9         | 0.07               |                      |                             |
|            | gf140fctz2   | 7.82E-12    | 0.26         | 4.38E-12     | 0.09          | 0.56 | 2.28E-13   | 0.23        | 60.35    | 228     | 102      | 96       | 53      | 7.17       | 295       | 0.80 | 24.8         | 0.06               |                      |                             |
| aft02      | aft02z1      | 4.18E-12    | 0.54         | 4.15E-13     | 1.56          | 0.10 | 5.40E-13   | 0.23        | 38.42    | 150     | 66       | 59       | 23      | 2.15       | 476       | 0.71 | 135.8        | 0.32               | 158.78               | 21.23<br>13.37              |
|            | aft02z2      | 4.35E-12    | 0.33         | 5.78E-13     | 1.04          | 0.13 | 6.87E-13   | 0.24        | 42.12    | 153     | 71       | 70       | 36      | 2.40       | 448       | 0.73 | 159.3        | 0.39               |                      |                             |
|            | aft02z4      | 4.37E-12    | 0.33         | 8.13E-13     | 0.75          | 0.19 | 6.94E-13   | 0.24        | 47.22    | 203     | 85       | 66       | 49      | 3.61       | 303       | 0.76 | 187.0        | 3.46               |                      |                             |
|            | aft02z5      | 2.59E-12    | 0.58         | 4.30E-13     | 1.52          | 0.17 | 4.61E-13   | 0.24        | 33.96    | 140     | 59       | 50       | 30      | 1.38       | 469       | 0.67 | 153.0        | 0.37               |                      |                             |
|            | aft03z1      | 2.96E-11    | 0.22         | 1.69E-10     | 0.40          | 5.71 | 1.89E-11   | 0.83        | 34.90    | 119     | 64       | 56       | 32      | 1.27       | 12843     | 0.65 | 193.5        | 0.46               |                      |                             |
| aft03      | aft03z2      | 1.74E-11    | 0.08         | 8.78E-11     | 0.26          | 5.03 | 1.08E-11   | 0.86        | 56.68    | 247     | 108      | 76       | 52      | 6.85       | 1310      | 0.77 | 324.5        | 2.75               | 274.50               | 56.82<br>20.70              |
|            | aft03z3      | 4.13E-11    | 0.27         | 1.25E-10     | 0.19          | 3.03 | 1.81E-11   | 1.11        | 35.61    | 129     | 62       | 57       | 14      | 1.80       | 9293      | 0.66 | 281.3        | 2.46               |                      |                             |
| aft03z6    | aft03z6      | 1.39E-13    | 13.97        | 7.38E-14     | 2.73          | 0.53 | 5.88E-14   | 0.25        | 83.49    | 562     | 144      | 106      | 48      | 35.39      | 1.06      | 0.86 | 298.6        | 3.38               | 266.97               | 19.01<br>7.12               |
|            | aft05z1      | 4.73E-12    | 0.55         | 8.21E-13     | 1.27          | 0.17 | 1.40E-12   | 1.32        | 40.01    | 173     | 64       | 62       | 43      | 2.14       | 552       | 0.72 | 297.6        | 4.03               |                      |                             |
| aft05      | aft05z2      | 3.20E-12    | 0.46         | 9.33E-13     | 0.78          | 0.29 | 8.65E-13   | 1.10        | 39.15    | 173     | 72       | 54       | 37      | 2.23       | 366       | 0.71 | 269.8        | 3.04               | 266.97               | 19.01<br>7.12               |
|            | aft05z5      | 3.15E-12    | 0.53         | 5.71E-13     | 1.08          | 0.18 | 7.59E-13   | 0.24        | 39.52    | 196     | 63       | 58       | 21      | 2.85       | 276       | 0.72 | 244.9        | 0.61               |                      |                             |
|            | aft05dkzr1   | 3.82E-12    | 0.54         | 1.96E-12     | 0.40          | 0.51 | 1.03E-12   | 0.25        | 41.47    | 180     | 70       | 61       | 50      | 2.25       | 454       | 0.72 | 253.5        | 0.64               |                      |                             |
|            | aft05dkzr2   | 4.32E-12    | 0.64         | 1.35E-12     | 0.74          | 0.31 | 1.12E-12   | 0.24        | 39.97    | 175     | 65       | 60       | 44      | 2.14       | 519       | 0.72 | 256.7        | 0.64               |                      |                             |
|            | aft05dkzr3   | 3.58E-12    | 0.54         | 4.92E-13     | 0.55          | 0.14 | 9.92E-13   | 0.24        | 37.97    | 144     | 66       | 59       | 37      | 1.71       | 518       | 0.71 | 286.8        | 0.71               |                      |                             |
| aft05dkzr4 | aft05dkzr4   | 5.79E-12    | 0.39         | 1.09E-12     | 0.20          | 0.19 | 1.53E-12   | 1.40        | 42.94    | 187     | 69       | 66       | 45      | 2.69       | 538       | 0.74 | 259.3        | 3.71               | 279.24               | 33.20<br>11.89              |
|            | aft06z1      | 1.66E-11    | 0.23         | 1.82E-12     | 0.37          | 0.11 | 4.76E-12   | 1.18        | 64.36    | 262     | 111      | 96       | 67      | 8.55       | 477       | 0.82 | 257.4        | 3.11               |                      |                             |
| aft06z2    | aft06z2      | 9.74E-12    | 0.15         | 3.26E-12     | 0.40          | 0.33 | 3.23E-12   | 1.41        | 65.29    | 246     | 108      | 106      | 55      | 9.20       | 273       | 0.82 | 282.9        | 4.08               | 279.24               | 33.20<br>11.89              |
|            | aft06z3      | 4.84E-12    | 0.33         | 1.44E-12     | 0.43          | 0.30 | 1.61E-12   | 1.43        | 53.28    | 195     | 89       | 88       | 62      | 4.08       | 304       | 0.78 | 299.2        | 4.39               |                      |                             |
| aft06z4    | aft06z4      | 1.63E-12    | 0.85         | 2.25E-13     | 2.76          | 0.14 | 5.03E-13   | 0.23        | 37.57    | 150     | 62       | 59       | 35      | 1.74       | 231       | 0.70 | 320.3        | 0.77               | 224.45               | 32.03<br>14.27              |
|            | aft06z5      | 2.31E-12    | 0.66         | 4.58E-13     | 1.44          | 0.20 | 5.42E-13   | 0.23        | 39.96    | 159     | 73       | 58       | 35      | 2.21       | 262       | 0.72 | 236.4        | 0.57               |                      |                             |
| aft07      | aft07z1      | 3.60E-12    | 0.51         | 7.54E-13     | 0.96          | 0.21 | 7.35E-13   | 0.24        | 40.98    | 148     | 70       | 67       | 30      | 2.33       | 389       | 0.72 | 204.3        | 0.50               | 224.45               | 32.03<br>14.27              |
|            | aft07z2      | 3.99E-12    | 0.39         | 6.97E-13     | 0.87          | 0.17 | 8.40E-13   | 1.38        | 41.59    | 148     | 73       | 67       | 37      | 2.24       | 444       | 0.73 | 210.8        | 2.96               |                      |                             |
|            | aft07z3      | 2.71E-12    | 0.61         | 6.67E-13     | 0.90          | 0.25 | 6.34E-13   | 0.24        | 39.83    | 147     | 69       | 63       | 39      | 1.92       | 358       | 0.72 | 234.0        | 0.57               |                      |                             |
|            | aft07z4      | 2.14E-12    | 0.71         | 3.69E-13     | 1.73          | 0.17 | 5.20E-13   | 0.24        | 36.84    | 123     | 64       | 63       | 33      | 1.48       | 361       | 0.70 | 253.3        | 0.62               |                      |                             |
|            | aft07z5      | 4.01E-12    | 0.42         | 7.48E-13     | 0.88          | 0.19 | 1.08E-12   | 1.22        | 43.52    | 157     | 77       | 69       | 29      | 2.91       | 344       | 0.74 | 263.0        | 3.28               |                      |                             |
| aft07dkzr1 | aft07dkzr1   | 5.68E-12    | 0.38         | 1.47E-12     | 0.19          | 0.26 | 1.51E-12   | 1.45        | 40.85    | 246     | 62       | 59       | 40      | 3.27       | 441       | 0.72 | 262.2        | 3.89               | 282.71               | 12.29<br>4.35               |
|            | aft07dkzr2   | 5.23E-12    | 0.41         | 1.91E-12     | 0.23          | 0.37 | 1.42E-12   | 1.76        | 46.02    | 158     | 103      | 66       | 37      | 3.44       | 395       | 0.75 | 253.7        | 4.57               |                      |                             |
|            | aft07dkzr3   | 7.22E-12    | 0.42         | 2.08E-12     | 0.21          | 0.29 | 1.53E-12   | 2.03        | 39.70    | 142     | 69       | 64       | 31      | 2.07       | 890       | 0.71 | 210.8        | 4.36               |                      |                             |
|            | aft07dkzr4   | 1.40E-11    | 0.32         | 2.80E-12     | 0.18          | 0.20 | 2.31E-12   | 1.48        | 41.83    | 191     | 66       | 64       | 29      | 2.98       | 1179      | 0.73 | 164.9        | 2.47               |                      |                             |
|            | aft07dkzr5   | 1.38E-11    | 0.24         | 3.01E-12     | 0.17          | 0.22 | 2.65E-12   | 1.68        | 43.04    | 184     | 69       | 66       | 34      | 2.96       | 1170      | 0.74 | 189.3        | 3.24               |                      |                             |
| aft07dkzr6 | aft07dkzr6   | 5.37E-12    | 0.43         | 1.11E-12     | 0.56          | 0.21 | 1.18E-12   | 0.23        | 39.11    | 169     | 63       | 60       | 26      | 2.37       | 569       | 0.71 | 222.7        | 0.52               | 282.71               | 12.29<br>4.35               |
|            | aft08z1      | 1.53E-12    | 0.89         | 8.02E-13     | 0.81          | 0.53 | 4.41E-13   | 0.23        | 39.06    | 163     | 64       | 61       | 24      | 2.35       | 175       | 0.70 | 276.6        | 0.66               |                      |                             |
| aft08z2    | aft08z2      | 3.46E-12    | 0.51         | 3.02E-12     | 0.26          | 0.87 | 1.10E-12   | 0.22        | 40.71    | 138     | 72       | 68       | 29      | 2.26       | 441       | 0.71 | 281.5        | 0.63               | 282.71               | 12.29<br>4.35               |
|            | aft08z3      | 3.29E-12    | 0.46         | 2.30E-12     | 0.39          | 0.70 | 9.64E-13   | 0.24        | 39.02    | 148     | 64       | 64       | 30      | 2.05       | 447       | 0.70 | 272.4        | 0.67               |                      |                             |
| aft08z4    | aft08z4      | 2.00E-12    | 0.78         | 1.86E-12     | 0.40          | 0.93 | 6.53E-13   | 0.24        | 36.32    | 138     | 61       | 58       | 29      | 1.63       | 355       | 0.68 | 300.3        | 0.73               |                      |                             |
